# Supplementary material
Source: PubMed Central journal article supplement (PMC11104963)

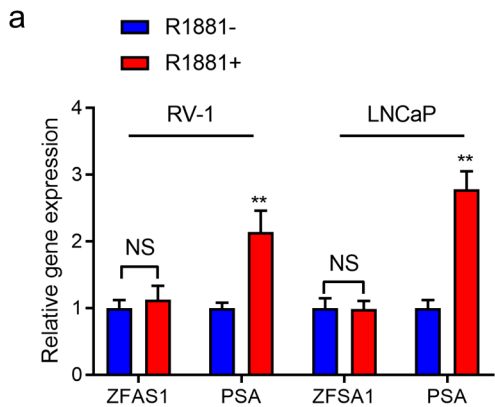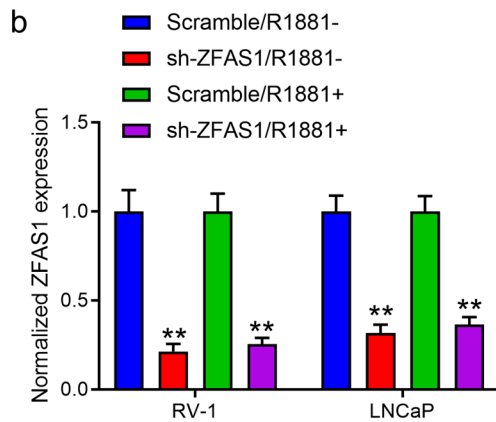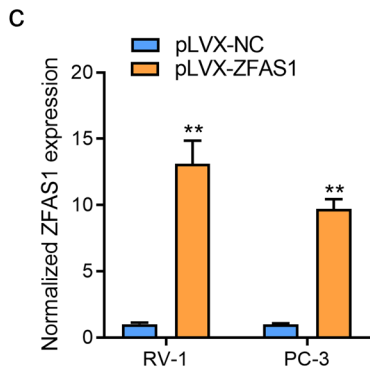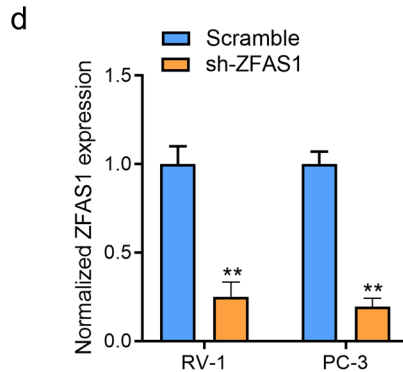

Supplement: 18_2019_3226_MOESM1_ESM.pdf [file 18_2019_3226_MOESM1_ESM.pdf]

a

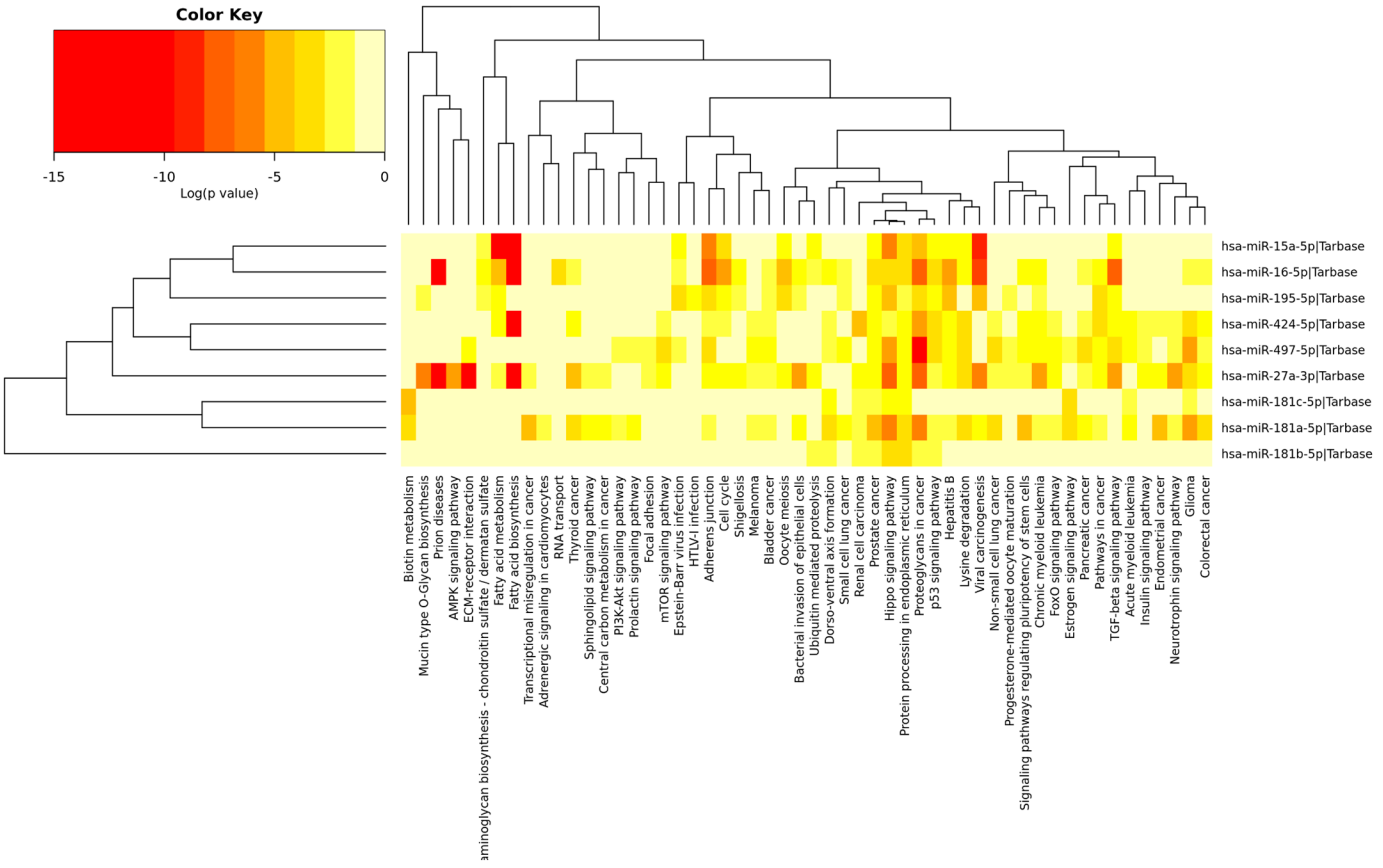

b

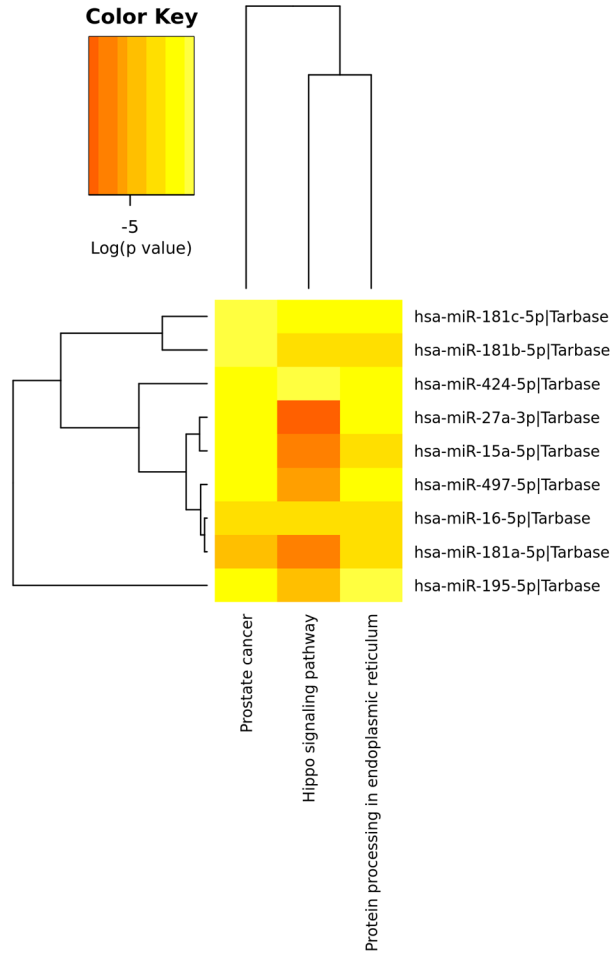

Supplement: 18_2019_3226_MOESM2_ESM.pdf [file 18_2019_3226_MOESM2_ESM.pdf]

**a**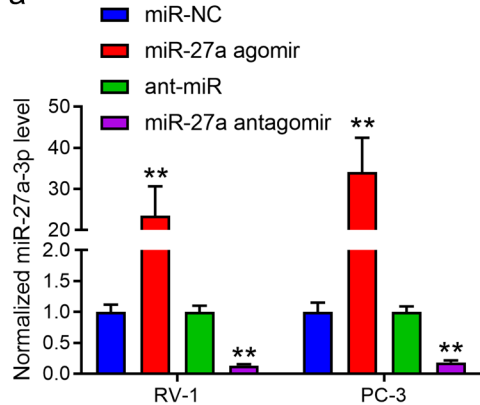**b**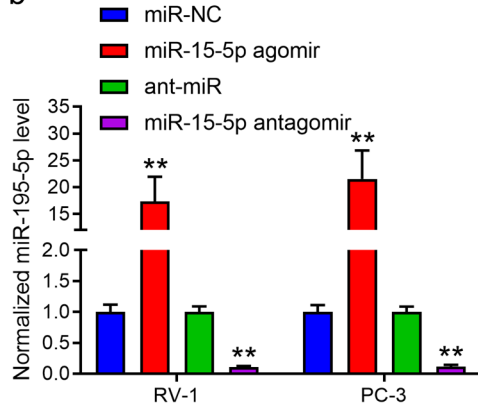**c**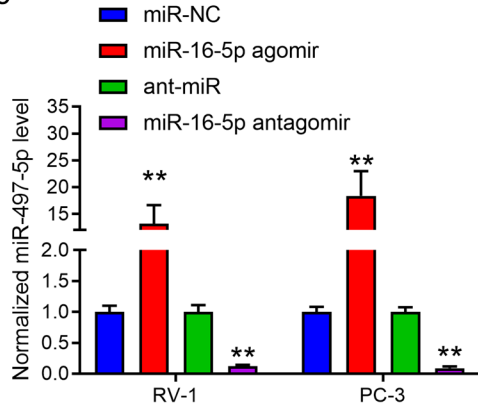

Supplement: 18_2019_3226_MOESM4_ESM.pdf [file 18_2019_3226_MOESM4_ESM.pdf]

a

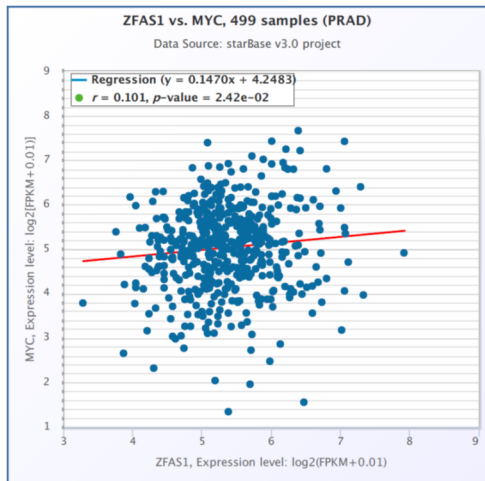

b

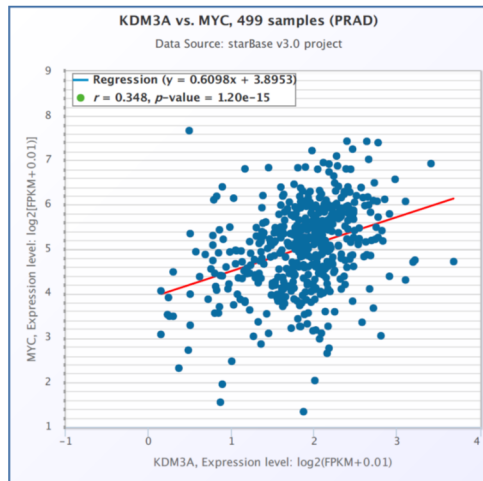

c

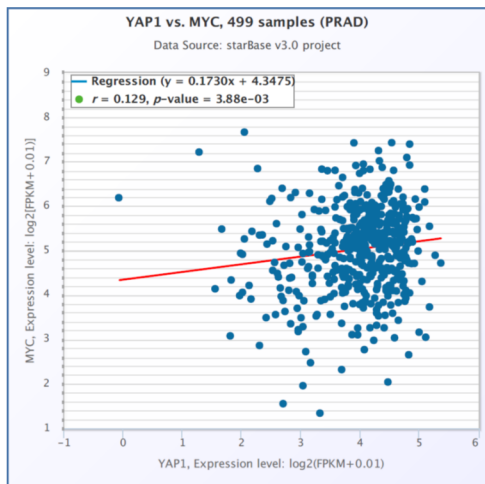

d

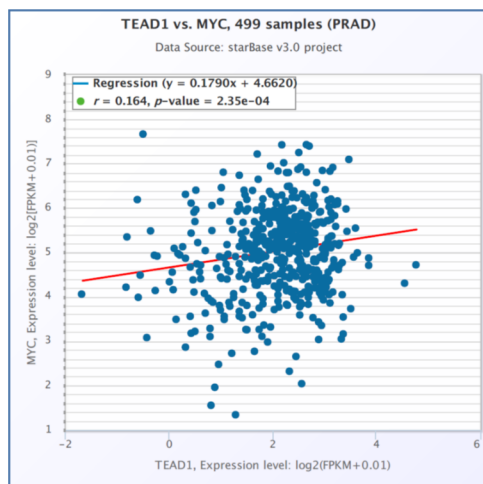

Supplement: 18_2019_3226_MOESM5_ESM.pdf [file 18_2019_3226_MOESM5_ESM.pdf]

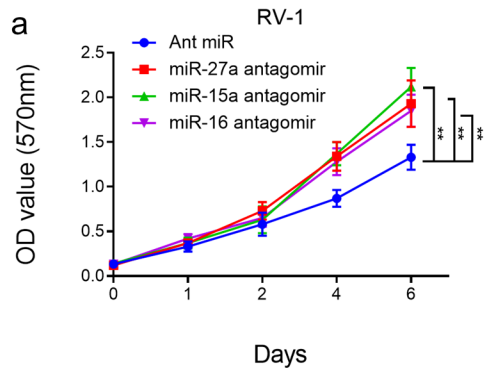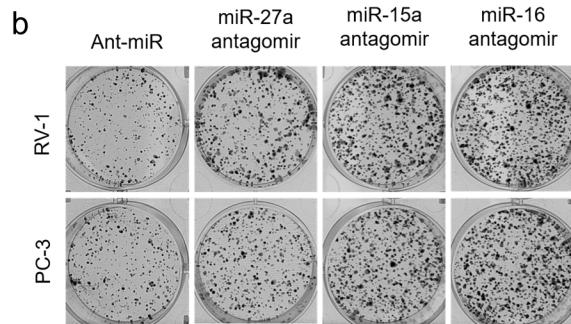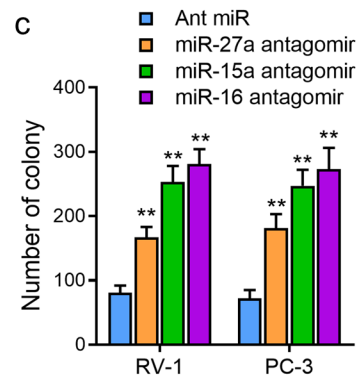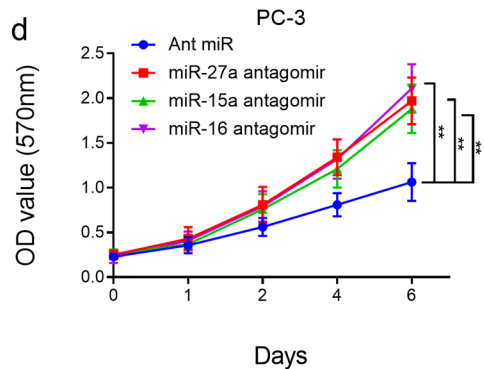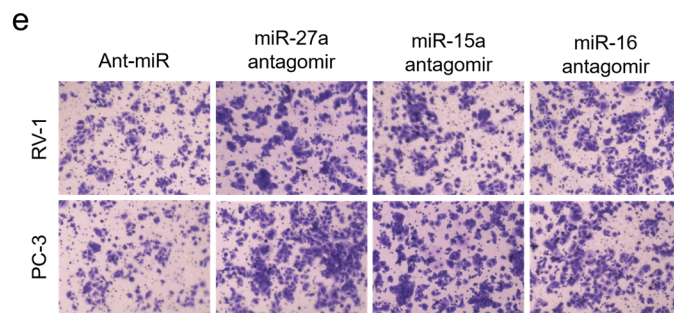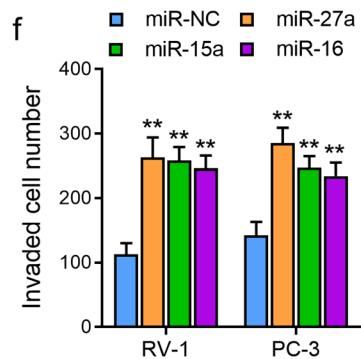

Supplement: 18_2019_3226_MOESM6_ESM.pdf [file 18_2019_3226_MOESM6_ESM.pdf]

## ZFAS1

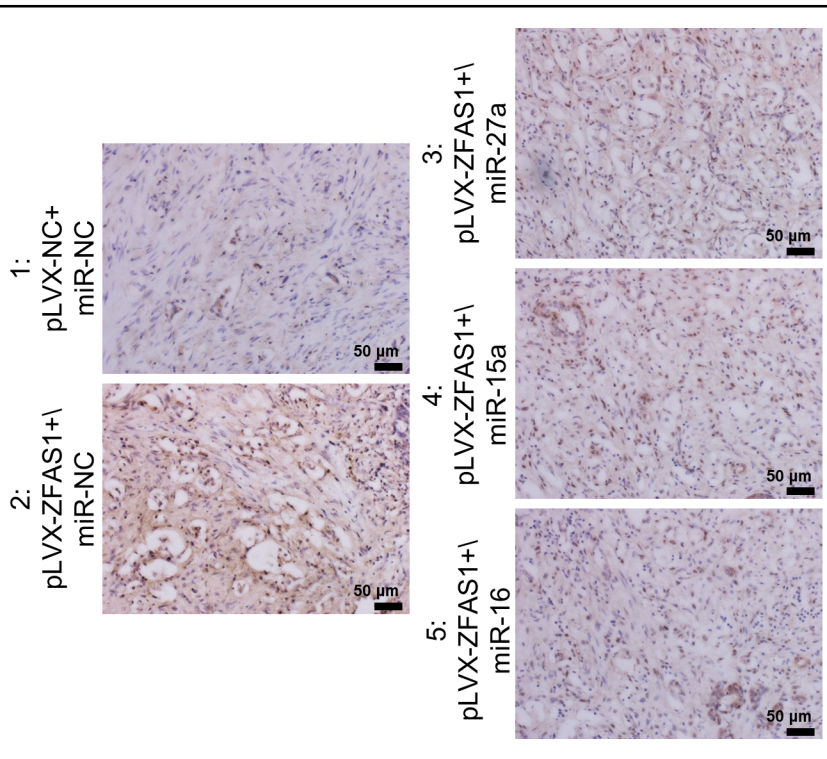

## c-Myc

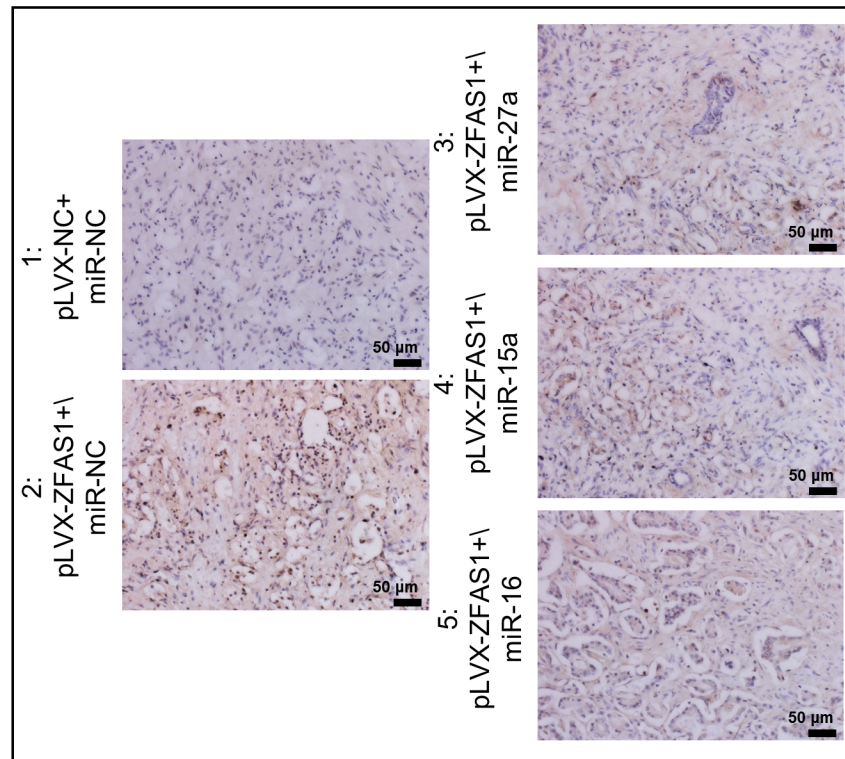

Supplement: 18_2019_3226_MOESM7_ESM.pdf [file 18_2019_3226_MOESM7_ESM.pdf]

a

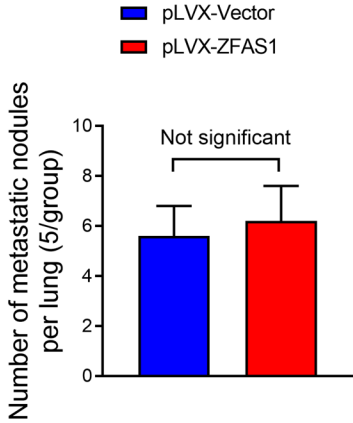

b

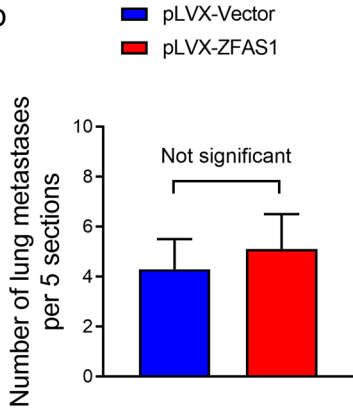

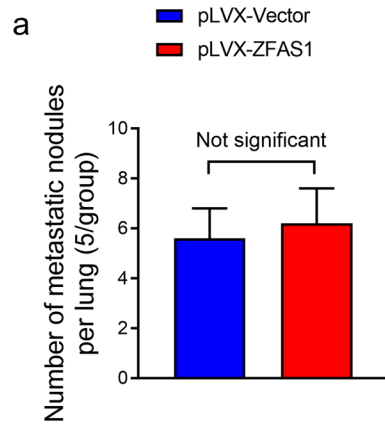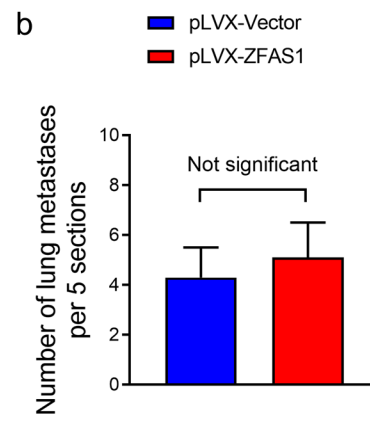

Supplement: 18_2019_3226_MOESM8_ESM.pdf [file 18_2019_3226_MOESM8_ESM.pdf]
